# Supplementary material for: Tirzepatide cardiovascular event risk assessment: a pre-specified meta-analysis
Source: PubMed Central journal article supplement (PMC8938269; doi:10.1038/s41591-022-01707-4), 2022-02-24
Supplement: 41591_2022_1707_MOESM1_ESM.pdf [file 41591_2022_1707_MOESM1_ESM.pdf]

---

**Supplementary information**

---

**Tirzepatide cardiovascular event risk  
assessment: a pre-specified meta-analysis**

---

In the format provided by the  
authors and unedited

## ONLINE-ONLY SUPPLEMENTARY APPENDIX

**Supplementary Table 1. Phase 2 and phase 3 tirzepatide trials included in the cardiovascular meta-analysis**

| Study                                 | Overall N | Background Antihyperglycemic Therapy                          | Trial Design                                         | Control/Comparator    | Treatment Duration <sup>a</sup> |
|---------------------------------------|-----------|---------------------------------------------------------------|------------------------------------------------------|-----------------------|---------------------------------|
| <b>Phase 2 Trial</b>                  |           |                                                               |                                                      |                       |                                 |
| <b>18F-MC-GPGB<sup>7</sup></b>        | 316       | ± MET for ≥3 mo.                                              | Randomized (TZP 4:PBO 1:DU 1), double-blind          | PBO<br>DU 1.5 mg QW   | 26 wk                           |
| <b>Global Phase 3 Trials</b>          |           |                                                               |                                                      |                       |                                 |
| <b>SURPASS-1<sup>5</sup></b>          | 478       | No OAM use for ≥3 mo.                                         | Randomized (TZP 3:PBO 1), double-blind               | PBO                   | 40 wk                           |
| <b>SURPASS-2<sup>6</sup></b>          | 1878      | Stable MET (≥1500 mg/day) for ≥3 mo.                          | Randomized (TZP 3:SEMA 1), open-labeled <sup>b</sup> | SEMA 1.0 mg QW        | 40 wk                           |
| <b>SURPASS-3<sup>35</sup></b>         | 1437      | Insulin naïve, stable MET (≥1500 mg/day) ± SGLT-2i for ≥3 mo. | Randomized (TZP 3:iDEG 1), open-labeled              | iDeg <sup>c</sup> QD  | 52 wk                           |
| <b>SURPASS-4<sup>11</sup></b>         | 1995      | Stable 1-3 OAMs (MET, SU, SGLT-2i) for ≥3 mo.                 | Randomized (TZP 3:iGlar 3), open-labeled             | iGlar <sup>d</sup> QD | 52-104 wk                       |
| <b>SURPASS-5<sup>37</sup></b>         | 475       | Insulin glargine ± MET for ≥3 mo.                             | Randomized (TZP 3:PBO 1), double-blind               | PBO                   | 40 wk                           |
| <b>Regional (Japan) Phase 3 Trial</b> |           |                                                               |                                                      |                       |                                 |
| <b>SURPASS J-mono<sup>36</sup></b>    | 636       | No OAM use for ≥2 mo.                                         | Randomized (TZP 3:DU 1), double-blind                | DU 0.75 mg QW         | 52 wk                           |

<sup>a</sup>All trials included a 4-week follow-up period after the treatment period. <sup>b</sup>Tirzepatide doses were double-blinded. <sup>c</sup>Starting dose of 10 IU/day, titrated to fasting blood glucose <90 mg/dL, following a treat-to-target algorithm. <sup>d</sup>Starting dose of 10 IU/day, titrated to fasting blood glucose <100 mg/dL, following a treat-to-target algorithm. Abbreviations: DU = dulaglutide; iDeg = insulin degludec; iGlar = insulin glargine; MET = metformin; mo. = months; OAM = oral antihyperglycemic medication; PBO = placebo; QD = once daily; QW = once weekly; SU = sulfonylurea; SGLT-2i = sodium glucose co-transporter 2 inhibitor; TZP = tirzepatide; wk = weeks

**Supplementary Table 2. Baseline cardiovascular risk assessment**

| <b>Cardiovascular Risk Assessment</b>                                                                                   | <b>All<br/>Tirzepatide<br/>N=4199</b> | <b>All Comparator<br/>N=2064</b> | <b>Total<br/>N=6263</b> |
|-------------------------------------------------------------------------------------------------------------------------|---------------------------------------|----------------------------------|-------------------------|
| <b>History of cardiovascular disease</b>                                                                                | 1213 (35.1)                           | 974 (34.4)                       | 2187 (34.9)             |
| <b>Prior myocardial infarction</b>                                                                                      | 404 (11.8)                            | 367 (12.5)                       | 771 (12.3)              |
| <b>Prior coronary revascularization procedure</b>                                                                       | 426 (12.4)                            | 358 (12.4)                       | 784 (12.5)              |
| <b>Prior stroke</b>                                                                                                     | 170 (4.9)                             | 138 (4.8)                        | 308 (4.9)               |
| <b>Prior hospitalization for unstable angina</b>                                                                        | 92 (2.7)                              | 95 (3.2)                         | 187 (3.0)               |
| <b>Prior hospitalization for heart failure</b>                                                                          | 92 (2.7)                              | 72 (2.5)                         | 164 (2.6)               |
| <b>Prior transient ischemic attack</b>                                                                                  | 63 (1.8)                              | 57 (2.0)                         | 120 (1.9)               |
| <b>Prior lower extremity arterial revascularization</b>                                                                 | 34 (1.0)                              | 33 (1.2)                         | 67 (1.1)                |
| <b>Prior carotid revascularization</b>                                                                                  | 21 (0.6)                              | 18 (0.6)                         | 39 (0.6)                |
| <b>Hypertension</b>                                                                                                     | 3020 (73.8)                           | 1607 (73.8)                      | 4627 (73.9)             |
| <b>Dyslipidemia</b>                                                                                                     | 2760 (67.7)                           | 1477 (67.8)                      | 4237 (67.7)             |
| <b>Documented coronary artery disease</b>                                                                               | 611 (17.6)                            | 508 (18.0)                       | 1119 (17.9)             |
| <b>Peripheral artery disease</b>                                                                                        | 379 (11.3)                            | 331 (11.5)                       | 710 (11.3)              |
| <b>Atrial fibrillation</b>                                                                                              | 98 (2.6)                              | 83 (3.2)                         | 181 (2.9)               |
| <b>First degree relatives diagnosed with coronary artery disease (males &lt;55 years old, females &lt;65 years old)</b> | 367 (9.2)                             | 168 (7.4)                        | 535 (8.6)               |
| <b>First degree relatives diagnosed with cerebrovascular disease</b>                                                    | 294 (7.2)                             | 164 (7.9)                        | 458 (7.3)               |

Trials GPGB and SURPASS J-mono, where baseline cardiovascular risk assessment was not performed, were excluded. Data are n (strata size adjusted percentage). Data include all randomized participants who had the baseline cardiovascular risk assessment data recorded in the eCRF at the screening visit (Visit 1). Strata are defined as trial-level cardiovascular risk (SURPASS-4 forms one stratum, and all other trials form one stratum). Number of participants with non-missing data, used as denominator. Abbreviations: N = number of participants in population; n = number of participants in the specified category.

**Supplementary Table 3. Baseline characteristics and cardiovascular risk assessment by trial**

|                                                                                                                         | <b>SURPASS-1</b> | <b>SURPASS-2</b> | <b>SURPASS-3</b> | <b>SURPASS-4</b> | <b>SURPASS-5</b> |
|-------------------------------------------------------------------------------------------------------------------------|------------------|------------------|------------------|------------------|------------------|
|                                                                                                                         | <b>N=478</b>     | <b>N=1878</b>    | <b>N=1437</b>    | <b>N=1995</b>    | <b>N=475</b>     |
| <b>Age, years (mean ± SD)</b>                                                                                           | 54.1 ± 11.9      | 56.6 ± 10.4      | 57.4 ± 10.0      | 63.6 ± 8.6       | 60.6 ± 9.9       |
| <b>Sex, female</b>                                                                                                      | 231 (48.3)       | 996 (53.0)       | 635 (44.2)       | 749 (37.5)       | 211 (44.4)       |
| <b>T2D duration, years (mean ± SD)</b>                                                                                  | 4.69 ± 5.38      | 8.62 ± 6.46      | 8.38 ± 6.24      | 11.78 ± 7.51     | 13.30 ± 7.31     |
| <b>History of cardiovascular disease</b>                                                                                | 26 (5.4)         | 151 (8.0)        | 190 (13.2)       | 1733 (86.9)      | 87 (18.3)        |
| <b>Prior myocardial infarction</b>                                                                                      | 5 (1.0)          | 57 (3.0)         | 45 (3.1)         | 644 (32.3)       | 20 (4.2)         |
| <b>Prior coronary revascularization procedure</b>                                                                       | 8 (1.7)          | 57 (3.0)         | 39 (2.7)         | 643 (32.2)       | 37 (7.8)         |
| <b>Prior stroke</b>                                                                                                     | 2 (0.4)          | 23 (1.2)         | 25 (1.7)         | 240 (12.0)       | 18 (3.8)         |
| <b>Prior hospitalization for unstable angina</b>                                                                        | 1 (0.2)          | 9 (0.5)          | 4 (0.3)          | 163 (8.2)        | 10 (2.1)         |
| <b>Prior hospitalization for heart failure</b>                                                                          | 2 (0.4)          | 9 (0.5)          | 10 (0.7)         | 139 (7.0)        | 4 (0.8)          |
| <b>Prior transient ischemic attack</b>                                                                                  | 0                | 9 (0.5)          | 11 (0.8)         | 96 (4.8)         | 4 (0.8)          |
| <b>Prior lower extremity arterial revascularization</b>                                                                 | 0                | 4 (0.2)          | 6 (0.4)          | 54 (2.7)         | 3 (0.6)          |
| <b>Prior carotid revascularization</b>                                                                                  | 1 (0.2)          | 1 (0.1)          | 2 (0.1)          | 34 (1.7)         | 1 (0.2)          |
| <b>Hypertension</b>                                                                                                     | 252 (52.7)       | 1187 (63.2)      | 1024 (71.3)      | 1794 (89.9)      | 370 (77.9)       |
| <b>Dyslipidemia</b>                                                                                                     | 202 (42.3)       | 1075 (57.2)      | 939 (65.3)       | 1666 (83.5)      | 355 (74.7)       |
| <b>Documented coronary artery disease</b>                                                                               | 15 (3.1)         | 73 (3.9)         | 105 (7.3)        | 878 (44.0)       | 48 (10.1)        |
| <b>Peripheral artery disease</b>                                                                                        | 4 (0.8)          | 35 (1.9)         | 53 (3.7)         | 604 (30.3)       | 14 (2.9)         |
| <b>Atrial fibrillation</b>                                                                                              | 4 (0.8)          | 23 (1.2)         | 22 (1.5)         | 119 (6.0)        | 13 (2.7)         |
| <b>First degree relatives diagnosed with coronary artery disease (males &lt;55 years old, females &lt;65 years old)</b> | 21 (4.4)         | 145 (7.7)        | 84 (5.8)         | 238 (12.0)       | 47 (9.9)         |
| <b>First degree relatives diagnosed with cerebrovascular disease</b>                                                    | 32 (6.7)         | 130 (6.9)        | 82 (5.7)         | 168 (8.4)        | 46 (9.7)         |

Studies GPGB and SURPASS J-mono, where baseline cardiovascular risk assessment was not performed, were not presented. Data are n (percentage), unless otherwise noted. Number of participants with non-missing data, used as denominator. Abbreviations: N = number of participants in population; n = number of participants in the specified category; SD = standard deviation.

**Supplementary Table 4. Summary of adjudication-confirmed MACE-4 by trial**

| <b>Trial</b>          | <b>Pooled Treatments<br/>n/N (%) [Event Rate]</b> |
|-----------------------|---------------------------------------------------|
| <b>GPGB</b>           | 2/316 (0.6) [1.13]                                |
| <b>SURPASS-1</b>      | 1/478 (0.2) [0.26]                                |
| <b>SURPASS-2</b>      | 14/1878 (0.7) [0.89]                              |
| <b>SURPASS-3</b>      | 10/1437 (0.7) [0.67]                              |
| <b>SURPASS-4</b>      | 109 /1995 (5.5) [3.52]                            |
| <b>SURPASS-5</b>      | 3/475 (0.6) [0.77]                                |
| <b>SURPASS J-mono</b> | 3/636 (0.5) [0.45]                                |

Event rate: number of patients experiencing MACE-4 per 100 person-years. Abbreviations; N = number of participants in population; n = number of patients who experienced at least one component of MACE-4.

**Supplementary Table 5. Assessment of bias for individual trials included in the meta-analysis**

| Trial                 | Risk of Bias Domains |    |    |    |    | Overall |
|-----------------------|----------------------|----|----|----|----|---------|
|                       | D1                   | D2 | D3 | D4 | D5 |         |
| <b>GPGB</b>           | +                    | +  | +  | +  | +  | +       |
| <b>SURPASS-1</b>      | +                    | +  | +  | +  | +  | +       |
| <b>SURPASS-2</b>      | +                    | +  | +  | +  | +  | +       |
| <b>SURPASS-3</b>      | +                    | +  | +  | +  | +  | +       |
| <b>SURPASS-4</b>      | +                    | +  | +  | +  | +  | +       |
| <b>SURPASS-5</b>      | +                    | +  | +  | +  | +  | +       |
| <b>SURPASS J-mono</b> | +                    | +  | +  | +  | +  | +       |

Judgement:

+ Low

Domains:

D1: Bias arising from the randomization process.

D2: Bias due to deviations from intended intervention.

D3: Bias due to missing outcome data.

D4: Bias in measurement of the outcome.

D5: Bias in section of the reported result.

**Supplementary Table 6. Baseline characteristics of cardiovascular risk – SURPASS-4 only**

| <b>Cardiovascular Risk Assessment</b>                                                                                   | <b>All<br/>Tirzepatide<br/>N=995</b> | <b>All Comparator<br/>N=1000</b> | <b>Total<br/>N=1995</b> |
|-------------------------------------------------------------------------------------------------------------------------|--------------------------------------|----------------------------------|-------------------------|
| <b>History of cardiovascular disease</b>                                                                                | 864 (86.8)                           | 869 (86.9)                       | 1733 (86.9)             |
| <b>Prior myocardial infarction</b>                                                                                      | 302 (30.4)                           | 342 (34.2)                       | 644 (32.3)              |
| <b>Prior coronary revascularization procedure</b>                                                                       | 315 (31.7)                           | 328 (32.8)                       | 643 (32.2)              |
| <b>Prior stroke</b>                                                                                                     | 116 (11.7)                           | 124 (12.4)                       | 240 (12.0)              |
| <b>Prior hospitalization for unstable angina</b>                                                                        | 73 (7.3)                             | 90 (9.0)                         | 163 (8.2)               |
| <b>Prior hospitalization for heart failure</b>                                                                          | 72 (7.2)                             | 67 (6.7)                         | 139 (7.0)               |
| <b>Prior transient ischemic attack</b>                                                                                  | 45 (4.5)                             | 51 (5.1)                         | 96 (4.8)                |
| <b>Prior lower extremity arterial revascularization</b>                                                                 | 25 (2.5)                             | 29 (2.9)                         | 54 (2.7)                |
| <b>Prior carotid revascularization</b>                                                                                  | 18 (1.8)                             | 16 (1.6)                         | 34 (1.7)                |
| <b>Hypertension</b>                                                                                                     | 888 (89.2)                           | 906 (90.6)                       | 1794 (89.9)             |
| <b>Dyslipidemia</b>                                                                                                     | 835 (83.9)                           | 831 (83.1)                       | 1666 (83.5)             |
| <b>Documented coronary artery disease</b>                                                                               | 425 (42.7)                           | 453 (45.3)                       | 878 (44.0)              |
| <b>Peripheral artery disease</b>                                                                                        | 304 (30.6)                           | 300 (30.0)                       | 604 (30.3)              |
| <b>Atrial fibrillation</b>                                                                                              | 52 (5.2)                             | 67 (6.7)                         | 119 (6.0)               |
| <b>First degree relatives diagnosed with coronary artery disease (males &lt;55 years old, females &lt;65 years old)</b> | 133 (13.4)                           | 105 (10.5)                       | 238 (12.0)              |
| <b>First degree relatives diagnosed with cerebrovascular disease</b>                                                    | 86 (8.7)                             | 82 (8.2)                         | 168 (8.4)               |

Data are n (crude percentage). Data include all randomized participants who had the baseline cardiovascular risk assessment data recorded in the eCRF at the screening visit (Visit 1). Number of participants with non-missing data, used as denominator. Abbreviations: N = number of participants in population; n = number of participants in the specified category.

**Supplementary Table 7. Baseline characteristics cardiovascular risk assessment – all studies except SURPASS-4**

| <b>Cardiovascular Risk Assessment</b>                                                                                   | <b>All<br/>Tirzepatide<br/>N=3204</b> | <b>All Comparator<br/>N=1064</b> | <b>Total<br/>N=4268</b> |
|-------------------------------------------------------------------------------------------------------------------------|---------------------------------------|----------------------------------|-------------------------|
| <b>History of cardiovascular disease</b>                                                                                | 349 (10.9)                            | 105 (9.9)                        | 454 (10.6)              |
| <b>Prior myocardial infarction</b>                                                                                      | 102 (3.2)                             | 25 (2.3)                         | 127 (3.0)               |
| <b>Prior coronary revascularization procedure</b>                                                                       | 111 (3.5)                             | 30 (2.8)                         | 141 (3.3)               |
| <b>Prior stroke</b>                                                                                                     | 54 (1.7)                              | 14 (1.3)                         | 68 (1.6)                |
| <b>Prior hospitalization for unstable angina</b>                                                                        | 19 (0.6)                              | 5 (0.5)                          | 24 (0.6)                |
| <b>Prior hospitalization for heart failure</b>                                                                          | 20 (0.6)                              | 5 (0.5)                          | 25 (0.6)                |
| <b>Prior transient ischemic attack</b>                                                                                  | 18 (0.6)                              | 6 (0.6)                          | 24 (0.6)                |
| <b>Prior lower extremity arterial revascularization</b>                                                                 | 9 (0.3)                               | 4 (0.4)                          | 13 (0.3)                |
| <b>Prior carotid revascularization</b>                                                                                  | 3 (0.1)                               | 2 (0.2)                          | 5 (0.1)                 |
| <b>Hypertension</b>                                                                                                     | 2132 (66.5)                           | 701 (65.9)                       | 2833 (66.4)             |
| <b>Dyslipidemia</b>                                                                                                     | 1925 (60.1)                           | 646 (60.7)                       | 2571 (60.2)             |
| <b>Documented coronary artery disease</b>                                                                               | 186 (5.8)                             | 55 (5.2)                         | 241 (5.6)               |
| <b>Peripheral artery disease</b>                                                                                        | 75 (2.3)                              | 31 (2.9)                         | 106 (2.5)               |
| <b>Atrial fibrillation</b>                                                                                              | 46 (1.6)                              | 16 (1.5)                         | 62 (1.5)                |
| <b>First degree relatives diagnosed with coronary artery disease (males &lt;55 years old, females &lt;65 years old)</b> | 234 (7.3)                             | 63 (5.9)                         | 297 (7.0)               |
| <b>First degree relatives diagnosed with cerebrovascular disease</b>                                                    | 208 (6.5)                             | 82 (7.7)                         | 290 (6.8)               |

Trials GPGB and SURPASS J-mono, where baseline cardiovascular risk assessment was not performed, were excluded. Data are n (crude percentage). Data include all randomized participants who had the baseline cardiovascular risk assessment data recorded in the eCRF at the screening visit (Visit 1). Number of participants with non-missing data, used as denominator. Abbreviations: N = number of participants in population; n = number of participants in the specified category.



**Supplementary Table 8. Unadjusted and adjusted baseline cardiovascular risk assessment – all patients**

| <b>Cardiovascular Risk Assessment</b>                                                                                   | <b>All Tirzepatide<br/>N=4199</b> | <b>All Comparator<br/>N=2064</b> | <b>Total<br/>N=6263</b> |
|-------------------------------------------------------------------------------------------------------------------------|-----------------------------------|----------------------------------|-------------------------|
| <b>History of cardiovascular disease</b>                                                                                | 1213 (28.9) [35.1]                | 974 (47.2) [34.4]                | 2187 (34.9)             |
| <b>Prior myocardial infarction</b>                                                                                      | 404 (9.6) [11.8]                  | 367 (17.8) [12.5]                | 771 (12.3)              |
| <b>Prior coronary revascularization procedure</b>                                                                       | 426 (10.1) [12.4]                 | 358 (17.3) [12.4]                | 784 (12.5)              |
| <b>Prior stroke</b>                                                                                                     | 170 (4.0) [4.9]                   | 138 (6.7) [4.8]                  | 308 (4.9)               |
| <b>Prior hospitalization for unstable angina</b>                                                                        | 92 (2.2) [2.7]                    | 95 (4.6) [3.2]                   | 187 (3.0)               |
| <b>Prior hospitalization for heart failure</b>                                                                          | 92 (2.2) [2.7]                    | 72 (3.5) [2.5]                   | 164 (2.6)               |
| <b>Prior transient ischemic attack</b>                                                                                  | 63 (1.5) [1.8]                    | 57 (2.8) [2.0]                   | 120 (1.9)               |
| <b>Prior lower extremity arterial revascularization</b>                                                                 | 34 (0.8) [1.0]                    | 33 (1.6) [1.2]                   | 67 (1.1)                |
| <b>Prior carotid revascularization</b>                                                                                  | 21 (0.5) [0.6]                    | 18 (0.9) [0.6]                   | 39 (0.6)                |
| <b>Hypertension</b>                                                                                                     | 3020 (71.9) [73.8]                | 1607 (77.9) [73.8]               | 4627 (73.9)             |
| <b>Dyslipidemia</b>                                                                                                     | 2760 (65.7) [67.7]                | 1477 (71.6) [67.8]               | 4237 (67.7)             |
| <b>Documented coronary artery disease</b>                                                                               | 611 (14.6) [17.6]                 | 508 (24.6) [18.0]                | 1119 (17.9)             |
| <b>Peripheral artery disease</b>                                                                                        | 379 (9.0) [11.3]                  | 331 (16.0) [11.5]                | 710 (11.3)              |
| <b>Atrial fibrillation</b>                                                                                              | 98 (2.3) [2.6]                    | 83 (4.0) [3.2]                   | 181 (2.9)               |
| <b>First degree relatives diagnosed with coronary artery disease (males &lt;55 years old, females &lt;65 years old)</b> | 367 (8.8) [9.2]                   | 168 (8.2) [7.4]                  | 535 (8.6)               |
| <b>First degree relatives diagnosed with cerebrovascular disease</b>                                                    | 294 (7.0) [7.2]                   | 164 (8.0) [7.9]                  | 458 (7.3)               |

Trials GPGB and SURPASS J-mono, where baseline cardiovascular risk assessment was not performed, were excluded. Data are n (crude percentage) [strata size adjusted estimate of percentage]. Data include all randomized participants who had the baseline cardiovascular risk assessment data recorded in the eCRF at the screening visit (Visit 1). Strata are defined as trial-level cardiovascular risk (SURPASS-4 forms one stratum, and all other trials form one stratum). Number of participants with non-missing data, used as denominator. Abbreviations: N = number of participants in population; n = number of participants in the specified category.
